# Supplementary material
Source: publisher figshare collection journal article supplement (https://tandf.figshare.com/ndownloader/files/20284740)
Supplement: Supplementary file 1 [file 20284740]

## Appendix 2: Search String

PubMed

*Patient-centeredness*

| Patient-centered care or patient-physician relations or person centered therapy or patient participation or consumer participation or patient preference or holistic health), MeSH |
| --- |
| (patient centered* or patient centred* or bio-psychosocial approach or integrative approach or holistic health or holistic approach), ti,ab. |
| (patient-physician relation* or patient physician relation* or doctor patient relation*), ti,ab,kw. |
| (client centered* or person centered* or person centred* or patient participation or client participation or consumer participation or patient preference*).ti,ab |
| ((Social support [mesh] or social support [ti, ab]) And (Patients [mesh] or Patients [ti,ab])) |

*Context*

| (medical education or clinical clerkship or preceptorship or professional continuing education or continuing education). MeSH |
| --- |
| (clinical clerk* or preceptorship or medical intern* or medical residenc* or medical education or professional continuing education or continuing education or medical school or clinical intern* or clinical residenc* ). ti,ab |
| (graduate medical education or internship and residency or undergraduate medical education), ti, ab |

*Learning*

| (learning or cognition or socialization or teaching), MeSH  [tiab] |
| --- |
| learning or cognition, or training or socialization or socialisation or teaching), ti,ab |

*Interventions*

| (simulation training or role playing or competency-based education), MeSH |
| --- |
| (interven* or teaching method* or curriculum or course content or simulation training or educational games or simulation games or simulation or role play* or educational program* or communication skills training or competency-based education), ti, ab |
| Curriculum, MeSH no-exp |
| (training method* or social skills training or learning activit* or design* or approach* or technique* or strateg* or method* or program* or format* or field work or non traditional education), ti, ab |

Note 1: curriculum [mesh no exp]: The MeSHterm curriculum includes non-matching terms in the tree structure. We only included the main keyword, using ‘Do not include MeSH terms found below this term in the MeSH hierarchy [no-exp]’. The tree-structure of ‘curriculum’ contains the relevant keyword: ‘competency-based education’, which we added to our search separately.

CINAHL

*Patient-centeredness*

| Patient-centered care or physician-patient relations or consumer participation or holistic health), thesaurus |
| --- |
| (patient centered* or patient centred* or biopsychosocial approach or integrative approach or holistic health or holistic approach), ti,ab. |
| (physician-patient relation* or patient physician relation* or doctor patient relation*), ti,ab,kw. |
| (client centered* or person centered* or person centred* or patient participation or client participation or consumer participation or patient preference*), ti,ab |
| ((Social support [thesaurus] or social support [ti, ab]) And (Patients [thesaurus] or Patients [ti,ab])) |

*Context*

| (medical education or Internship and Residency or preceptorship or Continuing Education), thesaurus |
| --- |
| (clinical clerk* or preceptorship or medical intern* or medical residenc* or medical education or professional continuing education or continuing education or medical school or clinical intern* or clinical residenc*). ti,ab |
| (graduate medical education or internship and residency or undergraduate medical education), ti, ab |

*Learning*

| (learning or socialization or teaching), thesaurus |
| --- |
| (learning or cognition, or training or socialization or socialisation or teaching), ti,ab |

*Interventions*

| (teaching methods or curriculum or course content or simulation or role playing or communications skills training or social skills training or non-traditional education or competency-based education), thesaurus |
| --- |
| (interven* or teaching method* or curriculum or course content or simulation training or educational games or simulation games or simulation or role play* or educational program* or communication skills training or competency-based education), ti, ab |
| (training method* or social skills training or learning activit* or design* or approach* or technique* or strateg* or method* or program* or format* or field work or non traditional education), ti, ab |

PsycInfo

*Patient-centeredness*

| (exp Holistic Health/ or exp Client Participation/ or exp Client Centered Therapy/ or exp Biopsychosocial Approach/), thesaurus |
| --- |
| (patient centered* or patient centred* or biopsychosocial approach or integrative approach or holistic health or holistic approach), ti,ab. |
| (physician-patient relation* or patient physician relation* or doctor patient relation*), ti,ab,kw. |
| (client centered* or person centered* or person centred* or patient participation or client participation or consumer participation or patient preference*).ti,ab |
| ((Social support [thesaurus] or social support [ti, ab]) And (Patients [thesaurus] or Patients [ti,ab])) |

*Context*

| (exp Continuing Education/ or exp Medical Residency/ or exp Medical Internship/), thesaurus |
| --- |
| (clinical clerk* or preceptorship or medical intern* or medical residenc* or medical education or professional continuing education or continuing education or medical school or clinical intern* or clinical residenc*). ti,ab |
| (graduate medical education or internship and residency or undergraduate medical education), ti, ab |

*Learning*

| (exp learning/ or exp socialization/ or exp teaching/ or exp cognition/ or exp training/), thesaurus |
| --- |
| (learning or cognition, or training or socialization or socialisation or teaching), ti,ab |

*Interventions*

| (exp Social Skills Training/ or exp Communication Skills Training/ or exp Educational Programs/ or exp Role Playing/ or exp INTERVENTION/ or exp Teaching Methods/ or exp Simulation Games/ or exp Nontraditional Education/ ), thesaurus |
| --- |
| (interven* or teaching method* or curriculum or course content or simulation training or educational games or simulation games or simulation or role play* or educational program* or communication skills training or competency-based education), ti, ab |
| (training method* or social skills training or learning activit* or design* or approach* or technique* or strateg* or method* or program* or format* or field work or non traditional education), ti, ab |

ERIC

*Patient-centeredness*

| (exp Holistic Approach/ or exp Physician Patient Relationship/ ), thesaurus |
| --- |
| (patient centered* or patient centred* or biopsychosocial approach or integrative approach or holistic health or holistic approach), ti,ab. |
| (physician-patient relation* or patient physician relation* or doctor patient relation*), ti,ab,kw. |
| (client centered* or person centered* or person centred* or patient participation or client participation or consumer participation or patient preference*).ti,ab |
| ((Social support [thesaurus] or social support [ti, ab]) And (Patients [thesaurus] or Patients [ti,ab])) |

*Context*

| (exp Continuing Education/ or medical education/), thesaurus |
| --- |
| (clinical clerk* or preceptorship or medical intern* or medical residenc* or medical education or professional continuing education or continuing education or medical school or clinical intern* or clinical residenc*). ti,ab |
| (graduate medical education or internship and residency or undergraduate medical education), ti, ab |

*Learning*

| (exp Socialization/ or social cognition/ or exp Training/ or exp Learning/), thesaurus |
| --- |
| (learning or cognition, or training or socialization or socialisation or teaching), ti,ab |

*Interventions*

| (exp Role Playing/ or exp curriculum / or exp Teaching Methods/ or exp Educational Games/ or exp Teaching Methods/ or exp Intervention/ or exp Course Content/ or exp Training Methods/ or exp Competency Based Education/ or exp Nontraditional Education/ ), thesaurus |
| --- |
| (interven* or teaching method* or curriculum or course content or simulation training or educational games or simulation games or simulation or role play* or educational program* or communication skills training or competency-based education), ti, ab |
| Curriculum [mesh no-exp] |
| (training method* or social skills training or learning activit* or design* or approach* or technique* or strateg* or method* or program* or format* or field work or non traditional education), ti, ab |

EmBase

*Patient-centeredness*

| ('doctor patient relation'/exp OR 'patient participation'/exp OR 'patient preference'/exp OR 'holistic care'/exp), thesaurus |
| --- |
| (patient centered* or patient centred* or biopsychosocial approach or integrative approach or holistic health or holistic approach), ti,ab. |
| (physician-patient relation* or patient physician relation* or doctor patient relation*), ti,ab,kw. |
| (client centered* or person centered* or person centred* or patient participation or client participation or consumer participation or patient preference*).ti,ab |
| ((Social support [thesaurus] or social support [ti, ab]) And (Patients [thesaurus] or Patients [ti,ab])) |

*Context*

| ('medical education'/exp OR 'continuing education'/exp), thesaurus |
| --- |
| (clinical clerk* or preceptorship or medical intern* or medical residenc* or medical education or professional continuing education or continuing education or medical school or clinical intern* or clinical residenc*). ti,ab |
| (graduate medical education or internship and residency or undergraduate medical education), ti, ab |

*Learning*

| ('learning'/exp OR 'training'/exp OR 'teaching'/exp OR 'cognition'/exp OR 'socialization'/exp), thesaurus |
| --- |
| (learning or cognition, or training or socialization or socialisation or teaching), ti,ab |

*Interventions*

| ('role playing'/exp OR 'simulation'/exp OR 'field work'/exp OR 'simulation training'/exp OR 'curriculum'/exp), thesaurus |
| --- |
| (interven* or teaching method* or curriculum or course content or simulation training or educational games or simulation games or simulation or role play* or educational program* or communication skills training or competency-based education), ti, ab |
| (training method* or social skills training or learning activit* or design* or approach* or technique* or strateg* or method* or program* or format* or field work or non traditional education), ti, ab |
